# Supplementary material
Source: PubMed Central journal article supplement (PMC6998057)
Supplement: Supp_Data.pdf [file Supp_Data.pdf]

## Supplementary Material

### List of primers used for quantitative real-time PCR

|                              | Forward Primer          | Reverse Primer              |
|------------------------------|-------------------------|-----------------------------|
| <b>TR<math>\beta</math></b>  | CCAGAAGACATTGGACAAGCACC | TGCCATTTCCCCATTCAAGG        |
| <b>TR<math>\alpha</math></b> | AAGGCAACTGGTTATCACTACCG | ACGGCGATGCACTTCTTGAA        |
| <b>ESR1</b>                  | TCCTAACTTGCTCTTGGACAGG  | GTAGCCAGCAGCATGTGC          |
| <b>PR</b>                    | ATCAACTAGGCGAGAGGCAACT  | TCGAAAACCTGGCAATGATTT       |
| <b>TFF-1</b>                 | TCCCCTGGTGCTTCTATCCTAA  | AGTGTCTAAAATTACACTCCTCTTCTG |
| <b>SOCS3</b>                 | ATCCTGGTGACATGCTCCTC    | GGCACCAGGTAGACTTTGGA        |
| <b>SOCS1</b>                 | TTTTCGCCCTTAGCGTGAAGA   | GAGGCAGTCGAAGCTCTCG         |
| <b>FGF9</b>                  | GGCCTGGTCAGCATTCGAG     | GTATCGCCTTCCAGTGTCCAC       |
| <b>FGFR3</b>                 | CCCAAATGGGAGCTGTCTCG    | CCCGTCTTGTCAATGCC           |
| <b>FGFR4</b>                 | CCATAGGGACCCCTCGAATAG   | CAGCGGAACTTGACGGTGT         |

### List of antibodies used

| ANTIBODY                          | CATEGORY          | DILUTION | SUPPLIER                 |
|-----------------------------------|-------------------|----------|--------------------------|
| <b>Sox2</b>                       | Rabbit monoclonal | 1:1000   | Abcam                    |
| <b>Nanog</b>                      | Rabbit polyclonal | 1:1000   | Merk                     |
| <b>ALDH1</b>                      | Mouse monoclonal  | 1:500    | BD                       |
| <b>TR<math>\beta</math></b>       | Mouse monoclonal  | 1:1000   | Santa Cruz Biotechnology |
| <b>GAPDH</b>                      | Rabbit monoclonal | 1:2000   | Sigma                    |
| <b>ER<math>\alpha</math></b>      | Rabbit polyclonal | 1:1000   | Santa Cruz Biotechnology |
| <b>Actin</b>                      | Goat polyclonal   | 1:10000  | Santa Cruz Biotechnology |
| <b>Phospho-Stat1 (Tyr701)</b>     | Rabbit monoclonal | 1:1000   | Cell Signaling           |
| <b>Stat1</b>                      | Rabbit Polyclonal | 1:1000   | Cell Signaling           |
| <b>Phospho-Stat3 (Tyr705)</b>     | Rabbit polyclonal | 1:2000   | Cell Signaling           |
| <b>Stat3</b>                      | Rabbit monoclonal | 1:2000   | Cell Signaling           |
| <b>ERK2</b>                       | Rabbit polyclonal | 1:20000  | Santa Cruz Biotechnology |
| <b>Phospho-p65 (Ser536)</b>       | Rabbit monoclonal | 1:1000   | Cell Signaling           |
| <b>p65</b>                        | Rabbit monoclonal | 1:1000   | Cell Signaling           |
| <b>IKB<math>\alpha</math></b>     | Rabbit polyclonal | 1:1000   | Santa Cruz Biotechnology |
| <b>Phospho-IKK (Ser176/180)</b>   | Rabbit monoclonal | 1:1000   | Cell Signaling           |
| <b>E-Cadherin</b>                 | Mouse monoclonal  | 1:3000   | BD                       |
| <b>Vimentin</b>                   | Mouse monoclonal  | 1:1000   | Progen                   |
| <b>Slug</b>                       | Goat polyclonal   | 1:500    | Santa Cruz Biotechnology |
| <b>Snail</b>                      | Mouse monoclonal  | 1:1000   | Cell Signaling           |
| <b>Phospho-Smad2 (Ser465/467)</b> | Rabbit polyclonal | 1:1000   | Cell Signalling          |
| <b>Smad2/3</b>                    | Rabbit polyclonal | 1:500    | Santa Cruz Biotechnology |
| <b>Phospho-Smad3 (Ser423/425)</b> | Rabbit monoclonal | 1:1000   | Cell Signalling          |
