# Supplementary material
Source: PubMed Central journal article supplement (PMC6998057)
Supplement: Supp_Fig1.pdf [file Supp_Fig1.pdf]

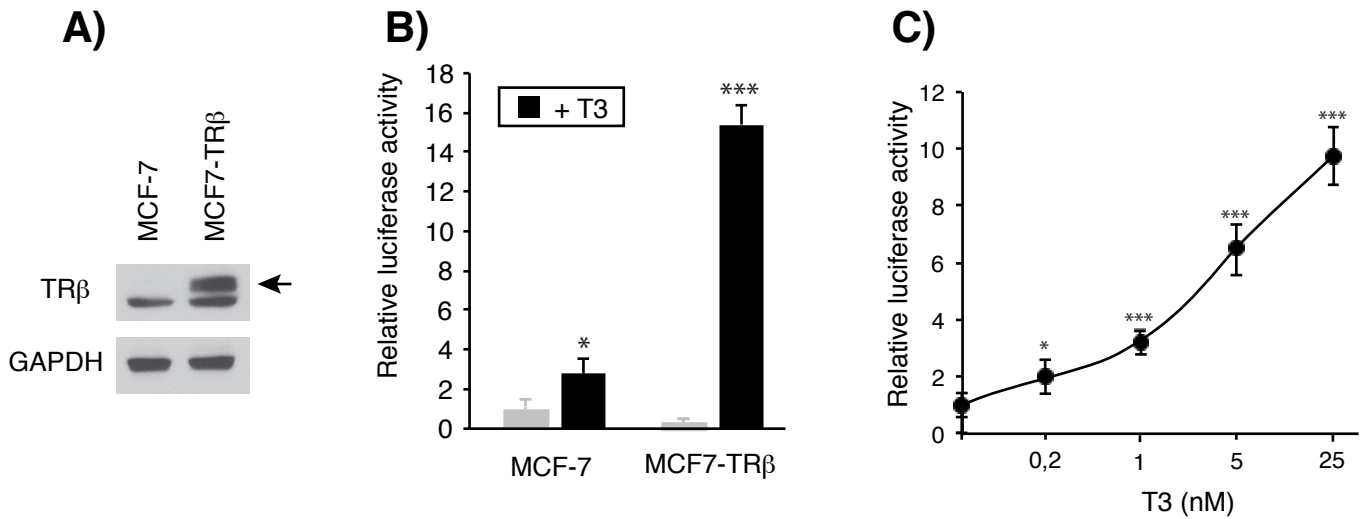

**Fig. S1.** TR $\beta$  status in MCF-7 cells. **A)** TR $\beta$  levels were detected by Western blot in MCF-7 cells expressing in a stable manner TR $\beta$  (MCF7-TR $\beta$ ) or only the control selector Neo gene (MCF-7). The TR $\beta$  specific band is labeled with an arrow (left panel). **B)** Luciferase activity was measured in cells transfected with a reporter plasmid containing 4 copies of a consensus thyroid hormone response element under control of the thymidine kinase promoter (DR4-TK-luc) and incubated in the presence and absence of 25 nM T3 for 36 h. Data are expressed relative to the luciferase values obtained in untreated MCF-7 cells. **C)** Luciferase activity in MCF7-TR $\beta$  cells transfected with the TRE-containing plasmid and treated with the indicated concentrations of T3. Data are expressed relative to the values obtained in the untreated cells. Data are means $\pm$ S.D. Asterisks show statistically significant differences between T3-treated and untreated cells.
