# Supplementary material
Source: PubMed Central journal article supplement (PMC6998057)
Supplement: Supp_Fig2.pdf [file Supp_Fig2.pdf]

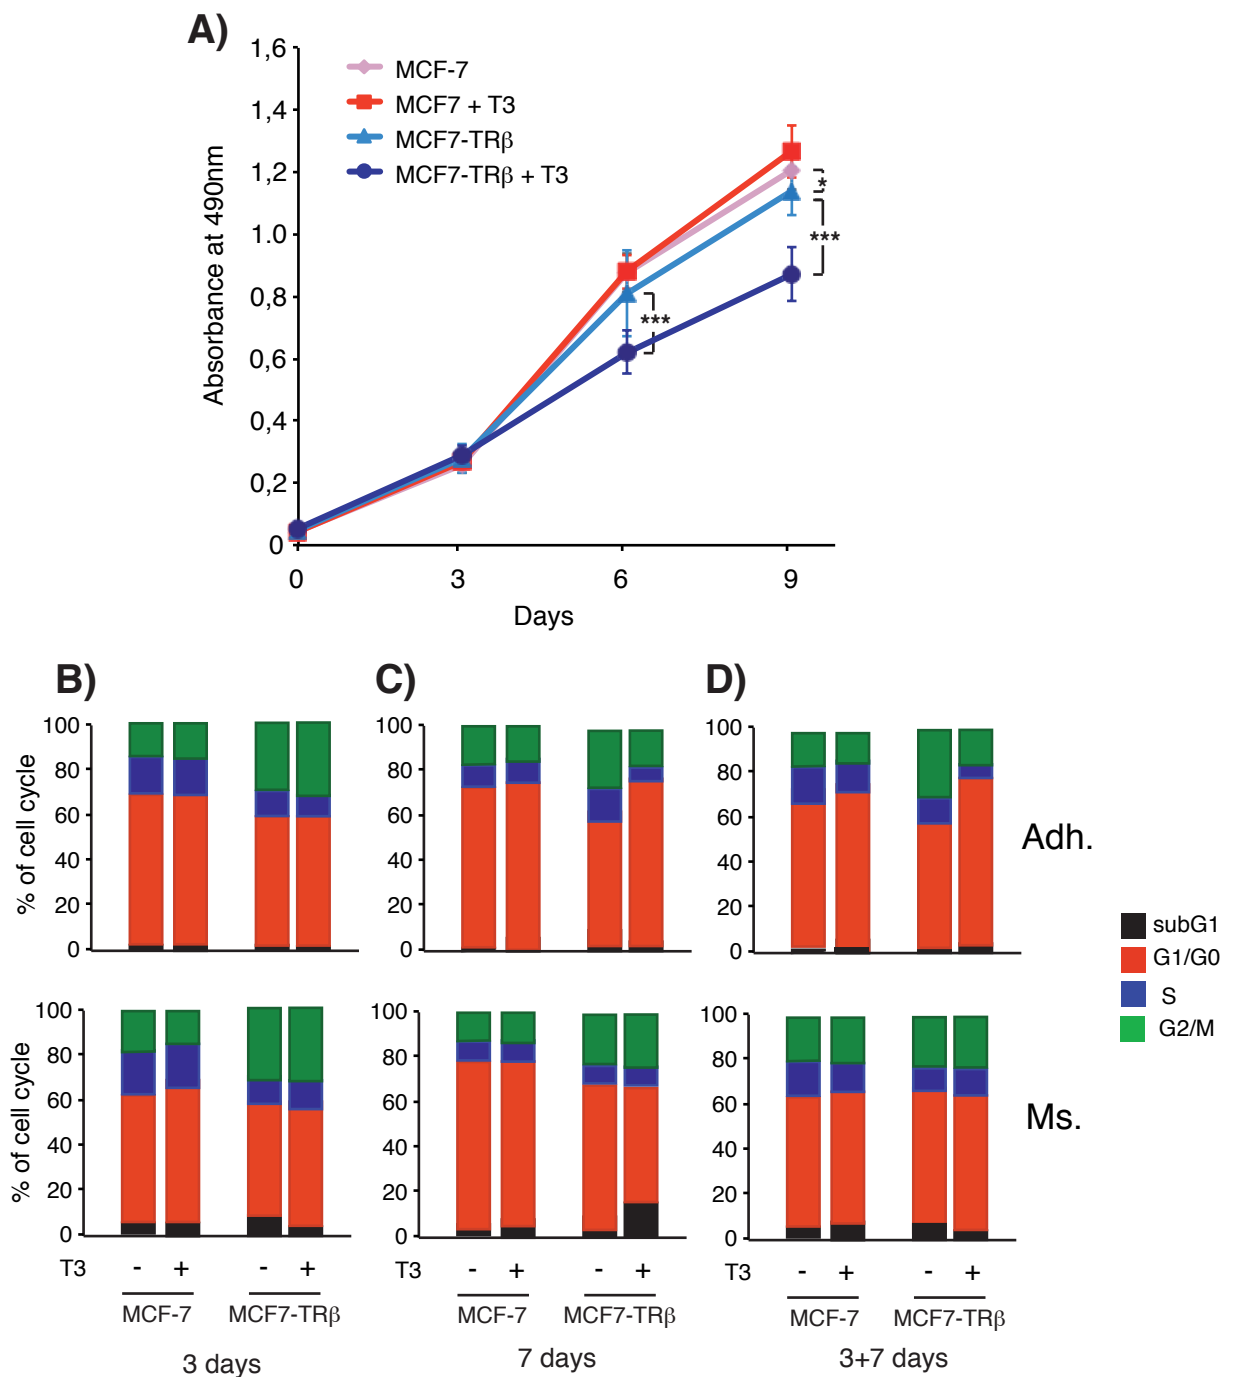

**Fig. S2.** Influence of T3 in MCF-7 cell proliferation. **A)** MTS assays in adherent cultures of MCF-7 and MCF7-TR $\beta$  cells incubated for the times indicated in the presence and absence of 25 nM T3. Data are means $\pm$ S.D of 16 independent wells. Asterisks denote existence of statistically significant differences between the indicated groups. **B)** Cell cycle distribution of cells grown as adherent cultures (Adh) or mammospheres (Ms) for 3 days in the presence and absence of T3 was determined by propidium iodide staining of DNA content. **C)** Similar experiment performed after 7 days of incubation with and without T3 of adherent cultures and primary mammospheres. **D)** Cell cycle analysis in 7-days secondary mammospheres derived from 3-days primary mammospheres and in adherent cultures incubated in the presence and absence of T3 during the same time period. Cell cycle data represent the mean of two independent experiments with similar results.
