# Supplementary material
Source: PubMed Central journal article supplement (PMC6998057)
Supplement: Supp_Fig3.pdf [file Supp_Fig3.pdf]

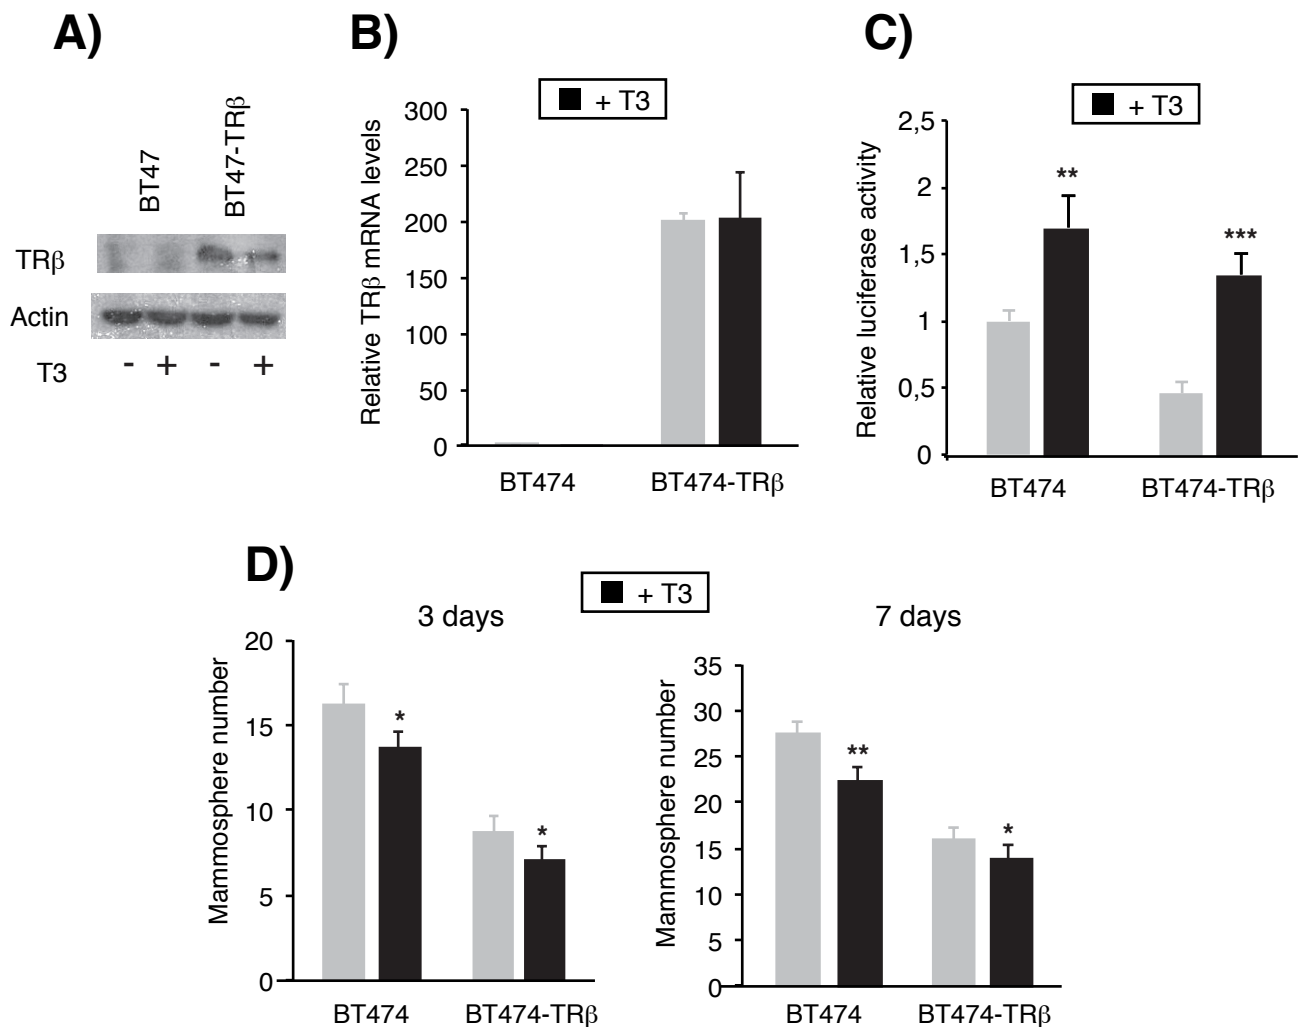

**Fig. S3.** T3 decreases mammospheres formation in BT474 cells. **A)** TRβ protein levels were measured by Western blot 72 h after transfection of BT474 cells with TRβ (BT474-TRβ) or with an empty vector (BT474). Cells were treated with and without 25 nM T3 and actin was used as a loading control. **B)** TRβ mRNA levels in the same cells. **C)** Luciferase activity was measured in BT474 and BT474TRβ cells transfected with the TRE reporter plasmid and incubated in the presence and absence of 25 nM T3 for 36 h. Data are expressed relative to the luciferase values obtained in untreated BT474 cells. **D)** Six h after transfection, BT474 and BT474-TRβ cells were inoculated at 5,000 cells/ml and grown under non-adherent conditions in the presence and absence of the hormone. The number of mammospheres generated at day 3 or at day 7 was quantitated from 16 independent cultures of each group. Data are means±S.D. Statistically significant differences between T3-treated and untreated cells are shown by asterisks.
