# Supplementary material
Source: PubMed Central journal article supplement (PMC6998057)
Supplement: Supp_Fig4.pdf [file Supp_Fig4.pdf]

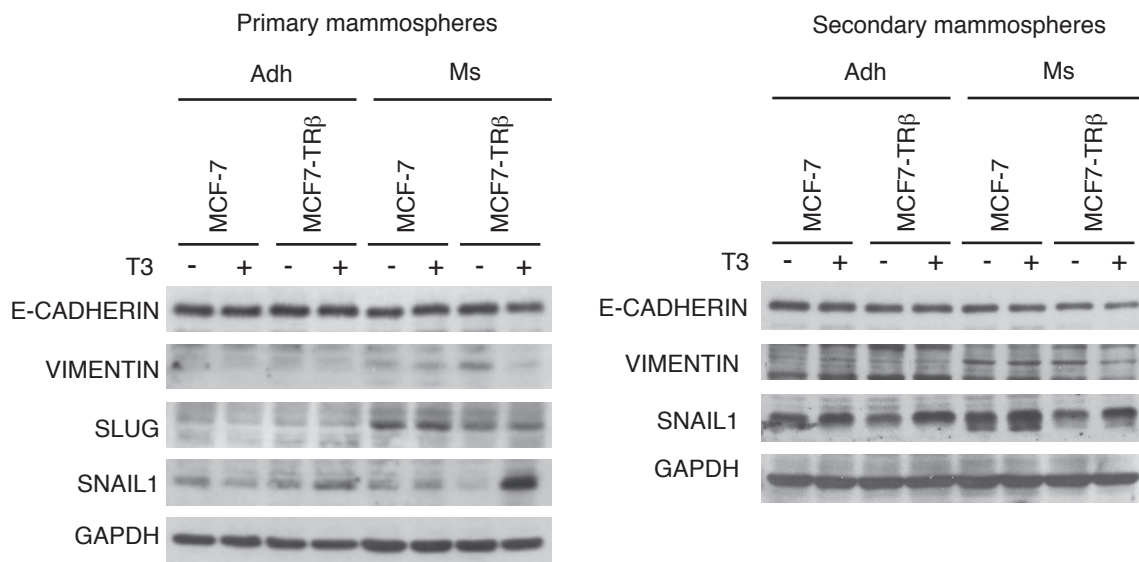

**Fig. S4.** Expression of EMT markers in adherent cells and mammospheres. The levels of the indicated proteins were assessed by Western blotting in extracts from MCF-7 cells expressing TRβ or their controls. In the left panel cells were incubated in the presence or absence of T3 during 3 days under adherent (Adh) or primary mammosphere conditions (Ms). In the right panel proteins were obtained from 7-days secondary mammospheres derived from 3-days primary mammospheres in the presence and absence of hormone and from adherent cells incubated with and without T3 from the same time period.
