# Supplementary material
Source: PubMed Central journal article supplement (PMC6998057)
Supplement: Supp_Fig5.pdf [file Supp_Fig5.pdf]

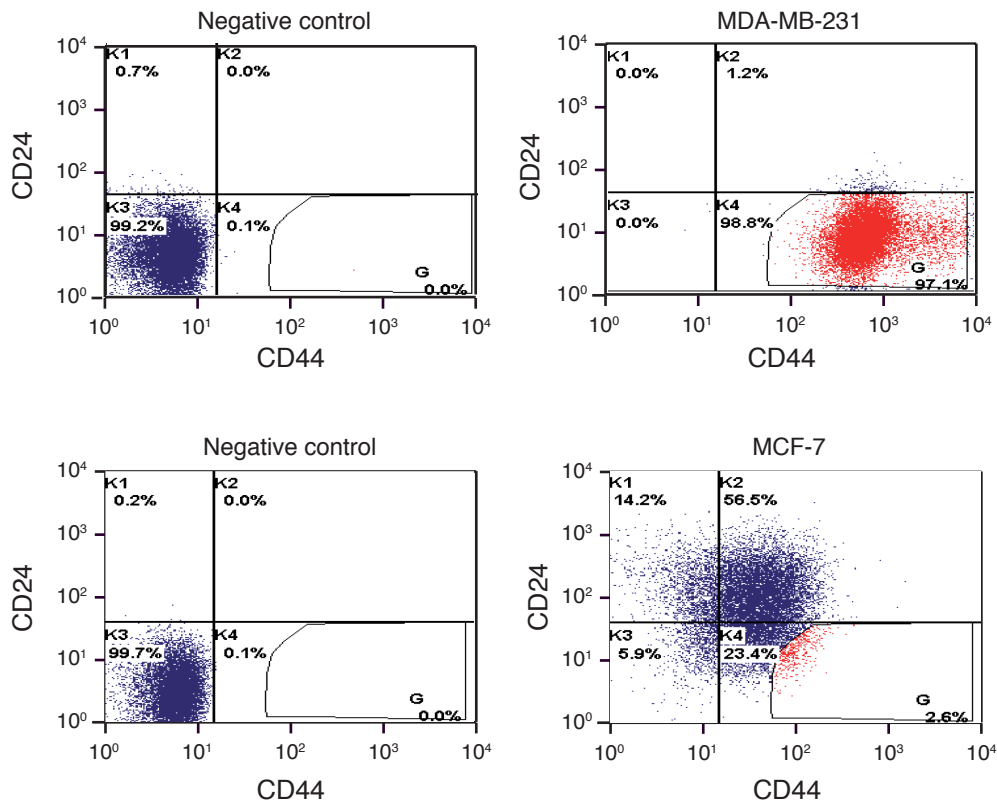

**Fig. S5.** CD24 and CD44 expression in MCF-7 and MDA-MB-231 cells. Representative dot plots of CD24 and CD44 expression in MCF-7 cells expressing the selector Neo gene cultured under adherent conditions (lower panel) and in the basal triple negative cell line MDA-MB-231 (upper panel). The left panels show the corresponding negative controls obtained in cells incubated with non-specific antibodies. MDA-MB-231 cells show a high CD44 expression and are negative for CD24, while MCF-7 cells are mainly CD24<sup>+</sup> and show a low expression of CD44. Gating obtained in the basal cell line was used in subsequent analysis to define populations with high CD44 expression.
