# Supplementary material
Source: PubMed Central journal article supplement (PMC6998057)
Supplement: Supp_Fig6.pdf [file Supp_Fig6.pdf]

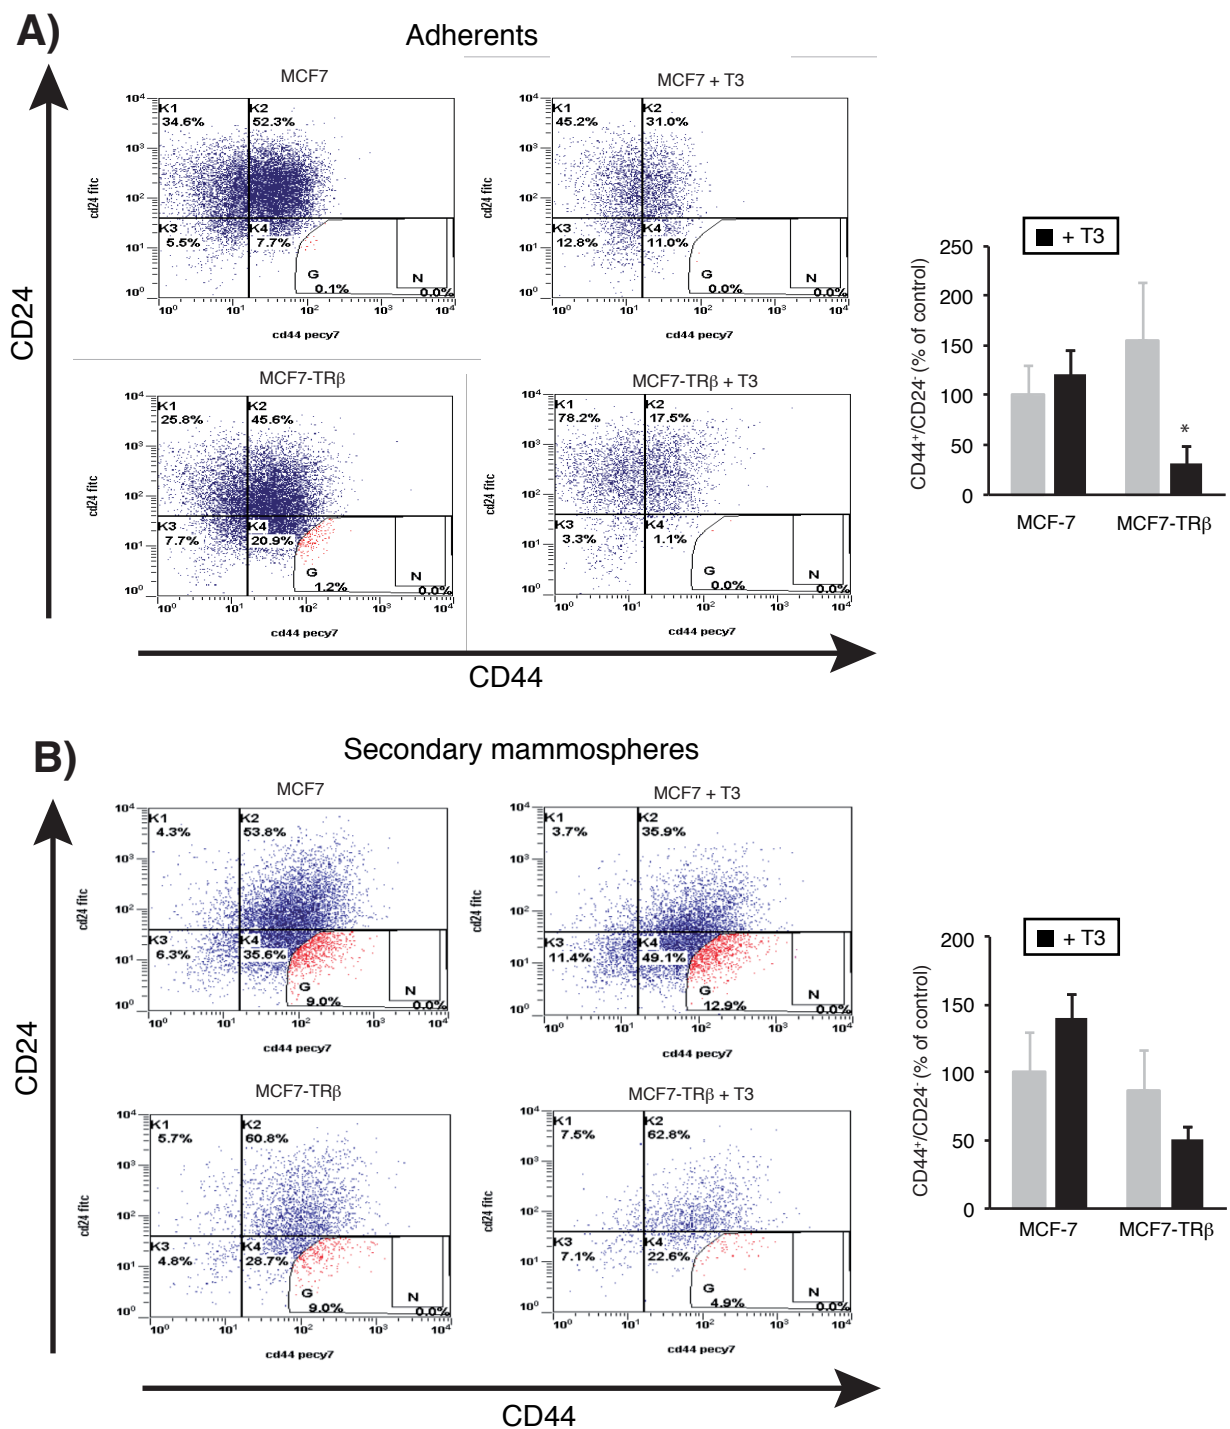

**Fig. S6.** CD44<sup>+</sup>CD24<sup>-</sup> cells in adherent cultures and mammospheres. A) Representative dot plot of CD24 and CD44 expression in adherent cultures of MCF-7 and MCF7-TRβ cells treated for 10 days in the presence and absence of T3. B) Expression profile in parallel mammosphere cultures untreated and treated with T3 for the same time period (7-days secondary mammospheres obtained from 3-days primary mammospheres). The right panels show the quantification of CD44<sup>+</sup>CD24<sup>-</sup> cells obtained in 3 independent experiments. Data are shown as the percentage of the results obtained in the untreated MCF-7 cells and are means ±S.D.
