# Supplementary material
Source: PubMed Central journal article supplement (PMC6998057)
Supplement: Supp_Fig7.pdf [file Supp_Fig7.pdf]

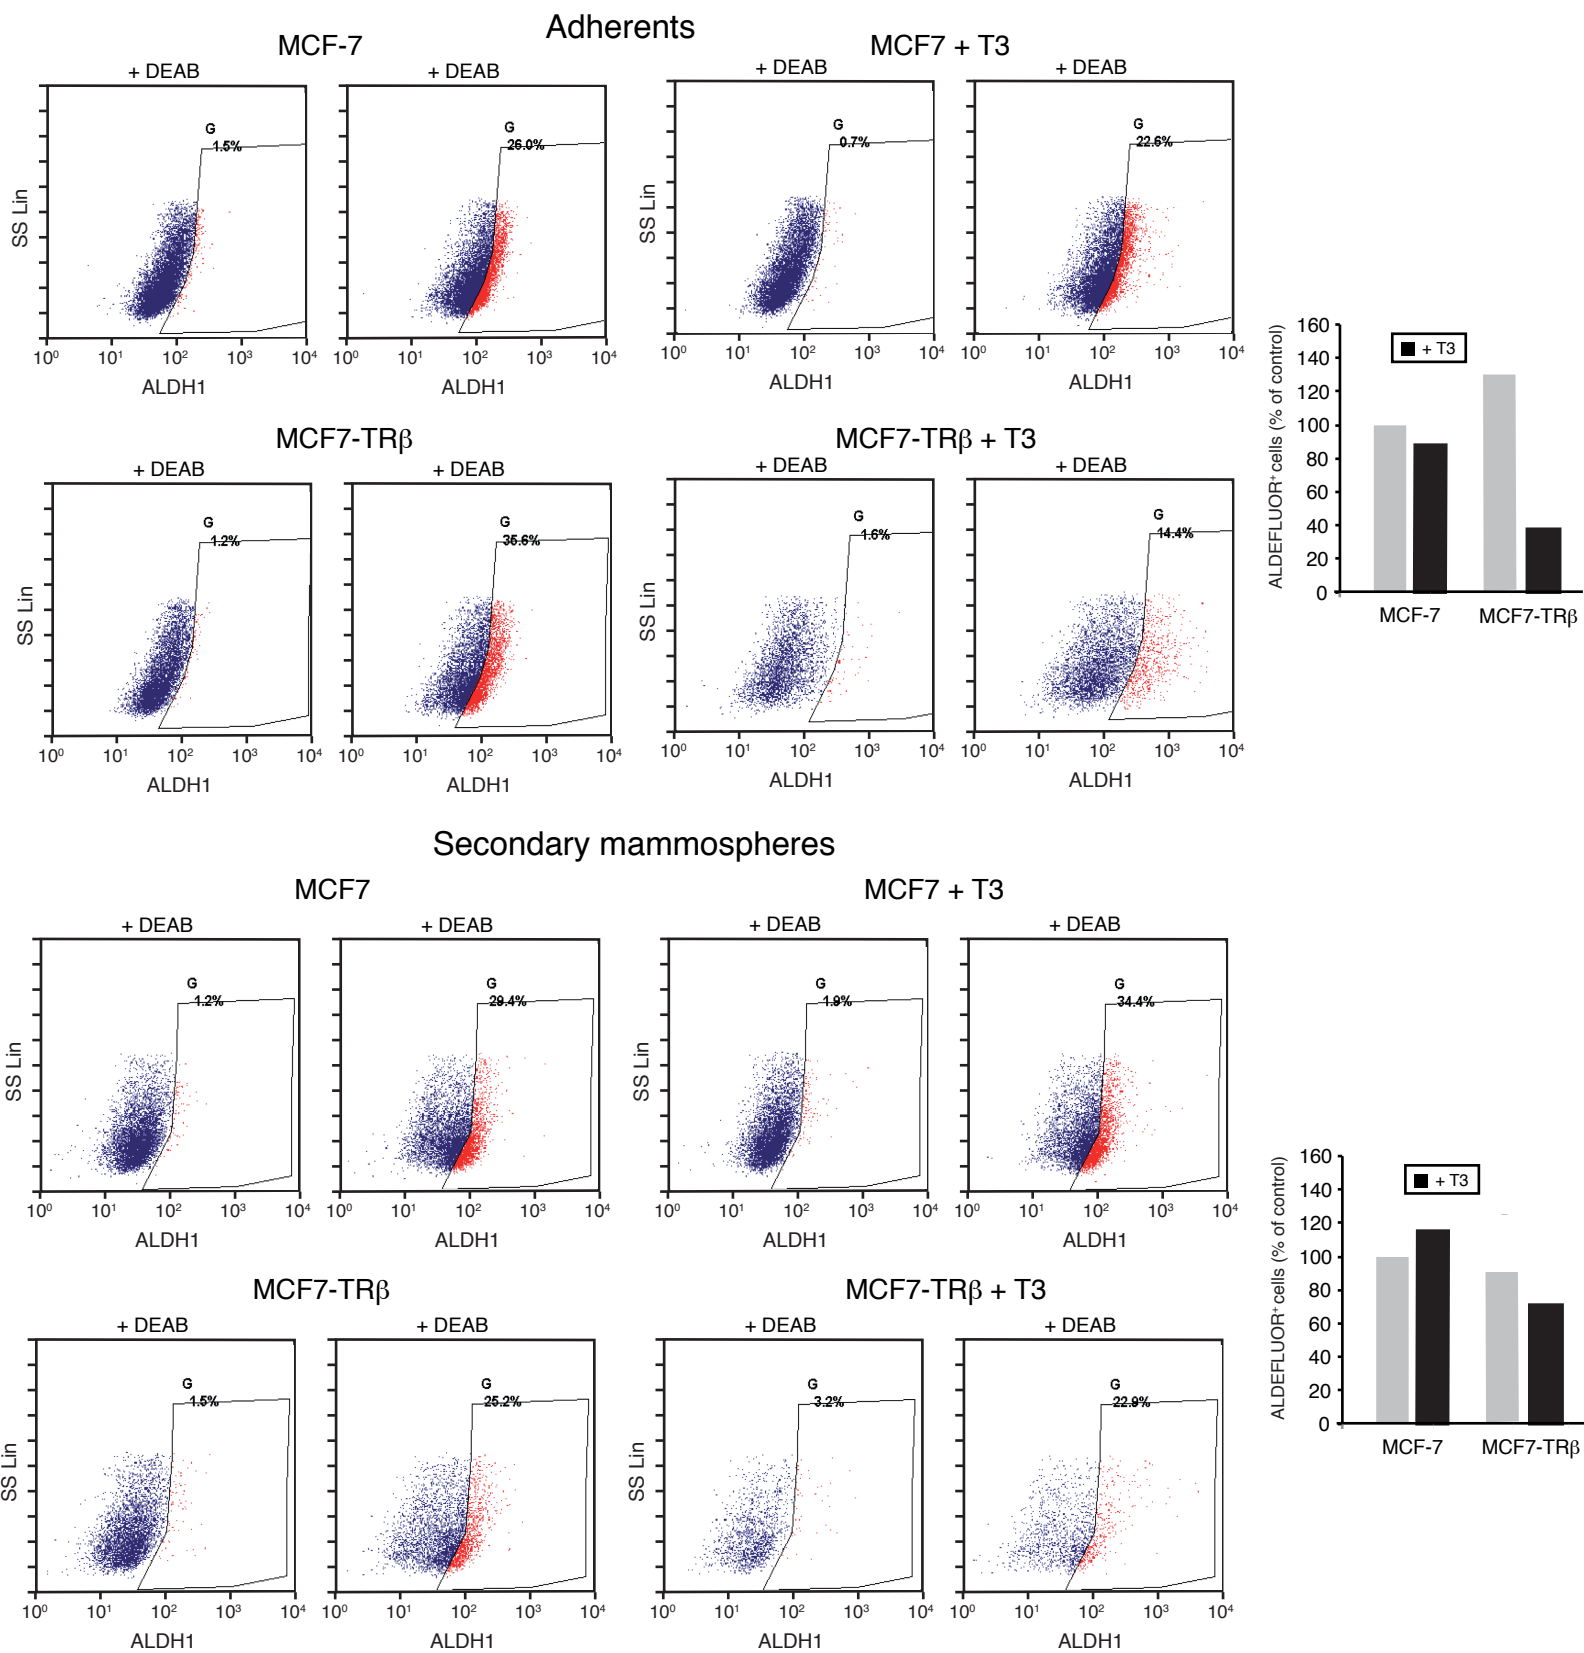

**Fig. S7.** ALDH<sup>+</sup> cells in adherent cultures and mammospheres. ALDFLUOR assays of MCF-7 and MCF7-TR $\beta$  adherent cultures treated for 10 days with and without T3 and in parallel cultures of 7-days secondary mammospheres obtained from 3-days primary mammospheres. Assays were performed in the absence and presence of DEAB. The right panels show the percentages of the ALDH activity with respect to the values obtained in the untreated MCF-7 cells. Similar results were obtained in an additional experiment.
