# Supplementary material
Source: PubMed Central journal article supplement (PMC6998057)
Supplement: Supp_Fig8.pdf [file Supp_Fig8.pdf]

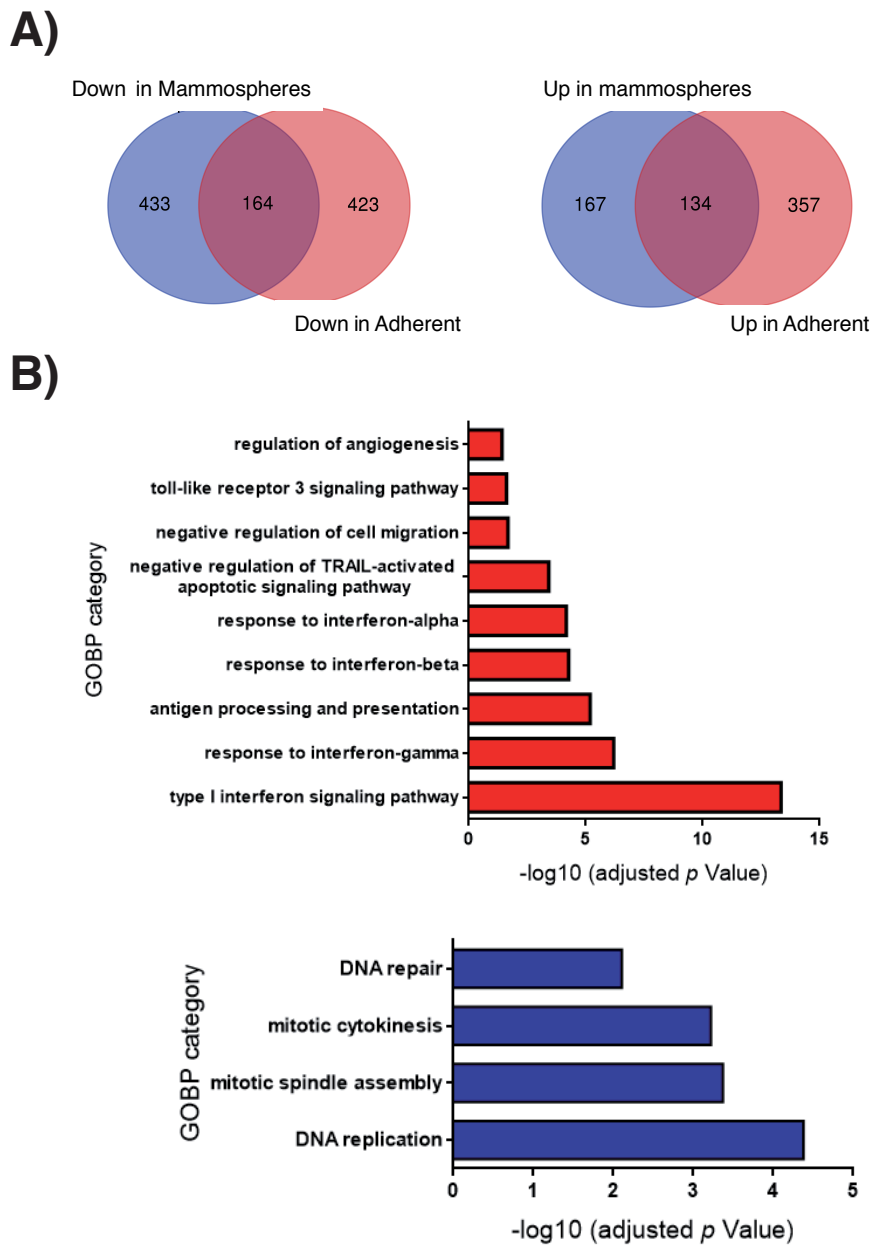

**Fig.S8.** Gene ontology of T3-regulated genes in MCF7-TR $\beta$  cells. **A)** Venn diagram of the intersection between annotated genes down-regulated and up-regulated by T3 in MCF7-TR $\beta$  cells grown as adherent cultures or secondary mammospheres. **B)** GOBP categories of the overlapping genes with significant enrichment (in red) or reduction (in blue) based in adjusted  $p$  values.
