# Supplementary material
Source: PubMed Central journal article supplement (PMC6998057)
Supplement: Supp_Fig9.pdf [file Supp_Fig9.pdf]

# A) Upregulated genes

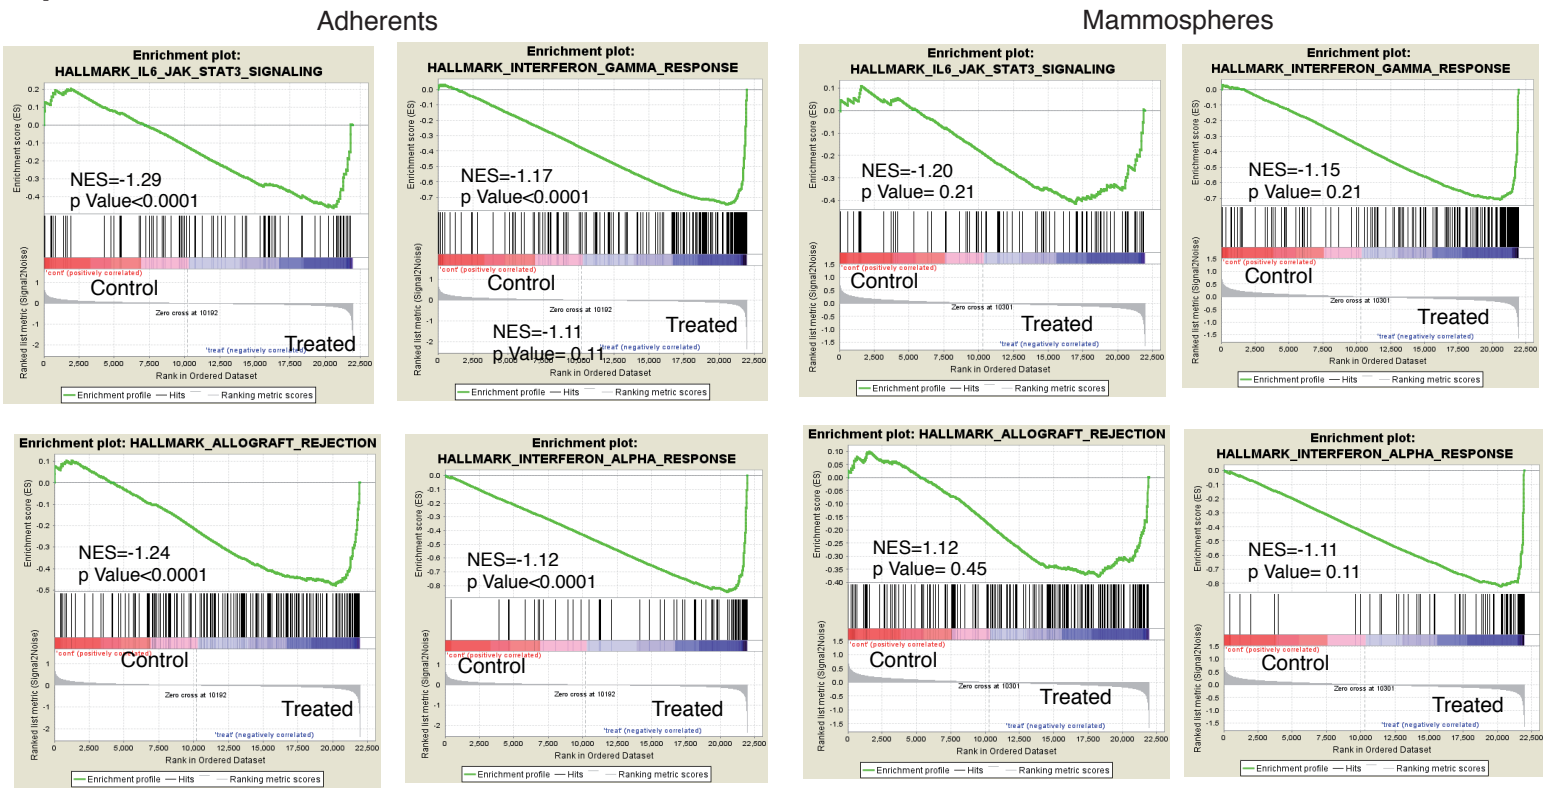

# B) Downregulated genes

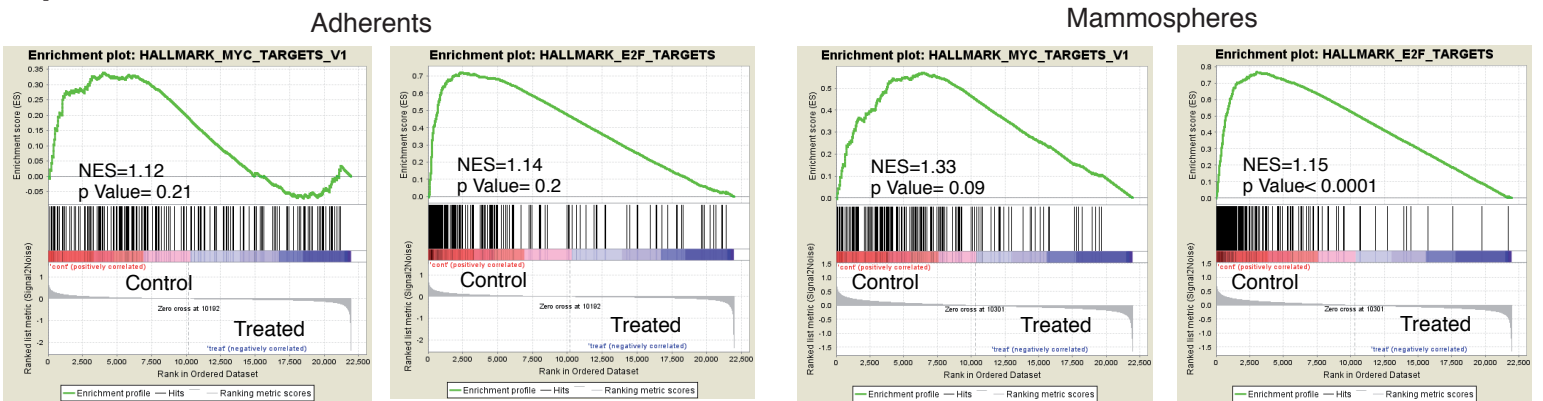

**Fig.S9.** GSEA of T3-regulated genes. **A)** Enrichment plots from GSEA showing the down-regulation of Hallmarks c-Myc and E2F targets in T3-treated MCF7-TR $\beta$  cells grown as adherent cells or secondary mammospheres. **B)** Over-represented Hallmarks in up-regulated genes in T3-treated MCF7-TR $\beta$  cells grown as adherent cells or secondary mammospheres.
