# Supplementary material
Source: PubMed Central journal article supplement (PMC6998057)
Supplement: Supp_Fig10.pdf [file Supp_Fig10.pdf]

**A)**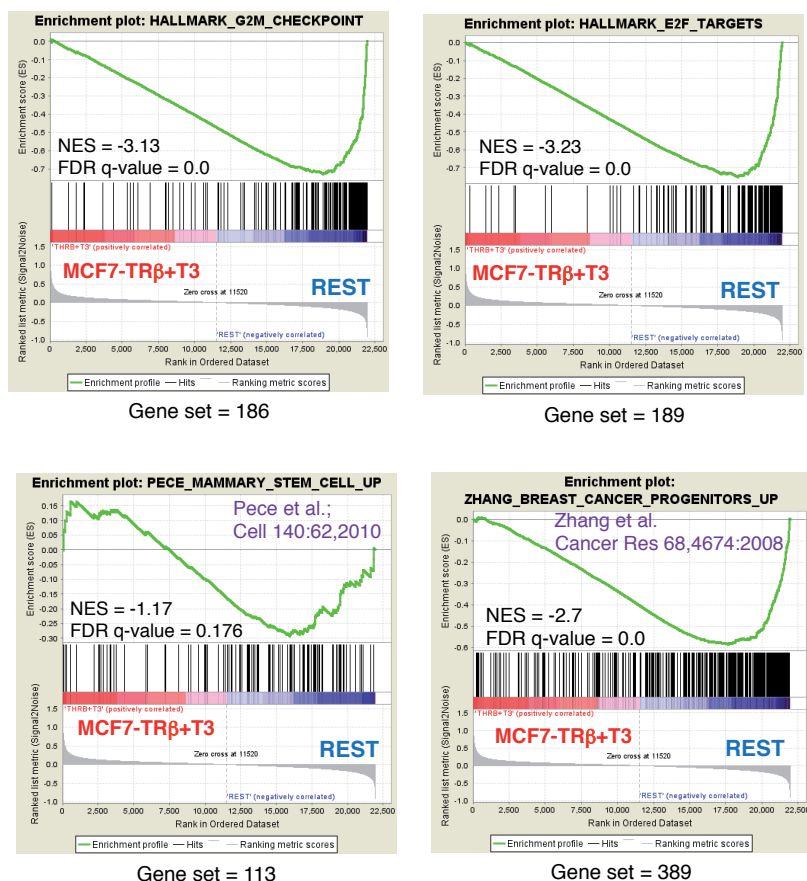**B)**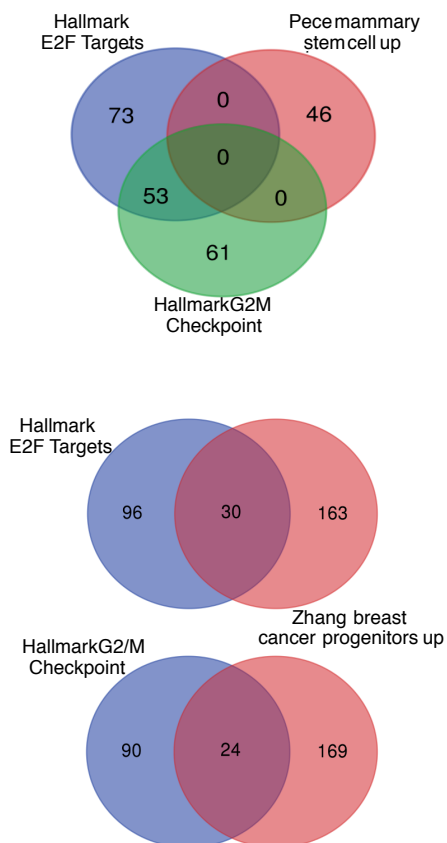

**Fig. S10.** Transcriptional analysis of proliferation and stem capacity of T3-treated MCF7-TR $\beta$  cells. **A)** Enrichment plots from GSEA showing the down-regulation of Hallmarks G2/M checkpoint and E2F targets (both related to proliferation and cell cycle) (above) and the down-regulation of genes implicated in both normal mammary stemness (Pece et al.) and breast cancer stem cells (Zhang et al.) (below) respect to the rest of the groups. Size of gene sets is shown below each plot. **B)** Venn diagrams showing the overlap between deregulated genes included in the different gene sets shown in figure A.
