# Supplementary material
Source: PubMed Central journal article supplement (PMC6998057)
Supplement: Supp_Fig11.pdf [file Supp_Fig11.pdf]

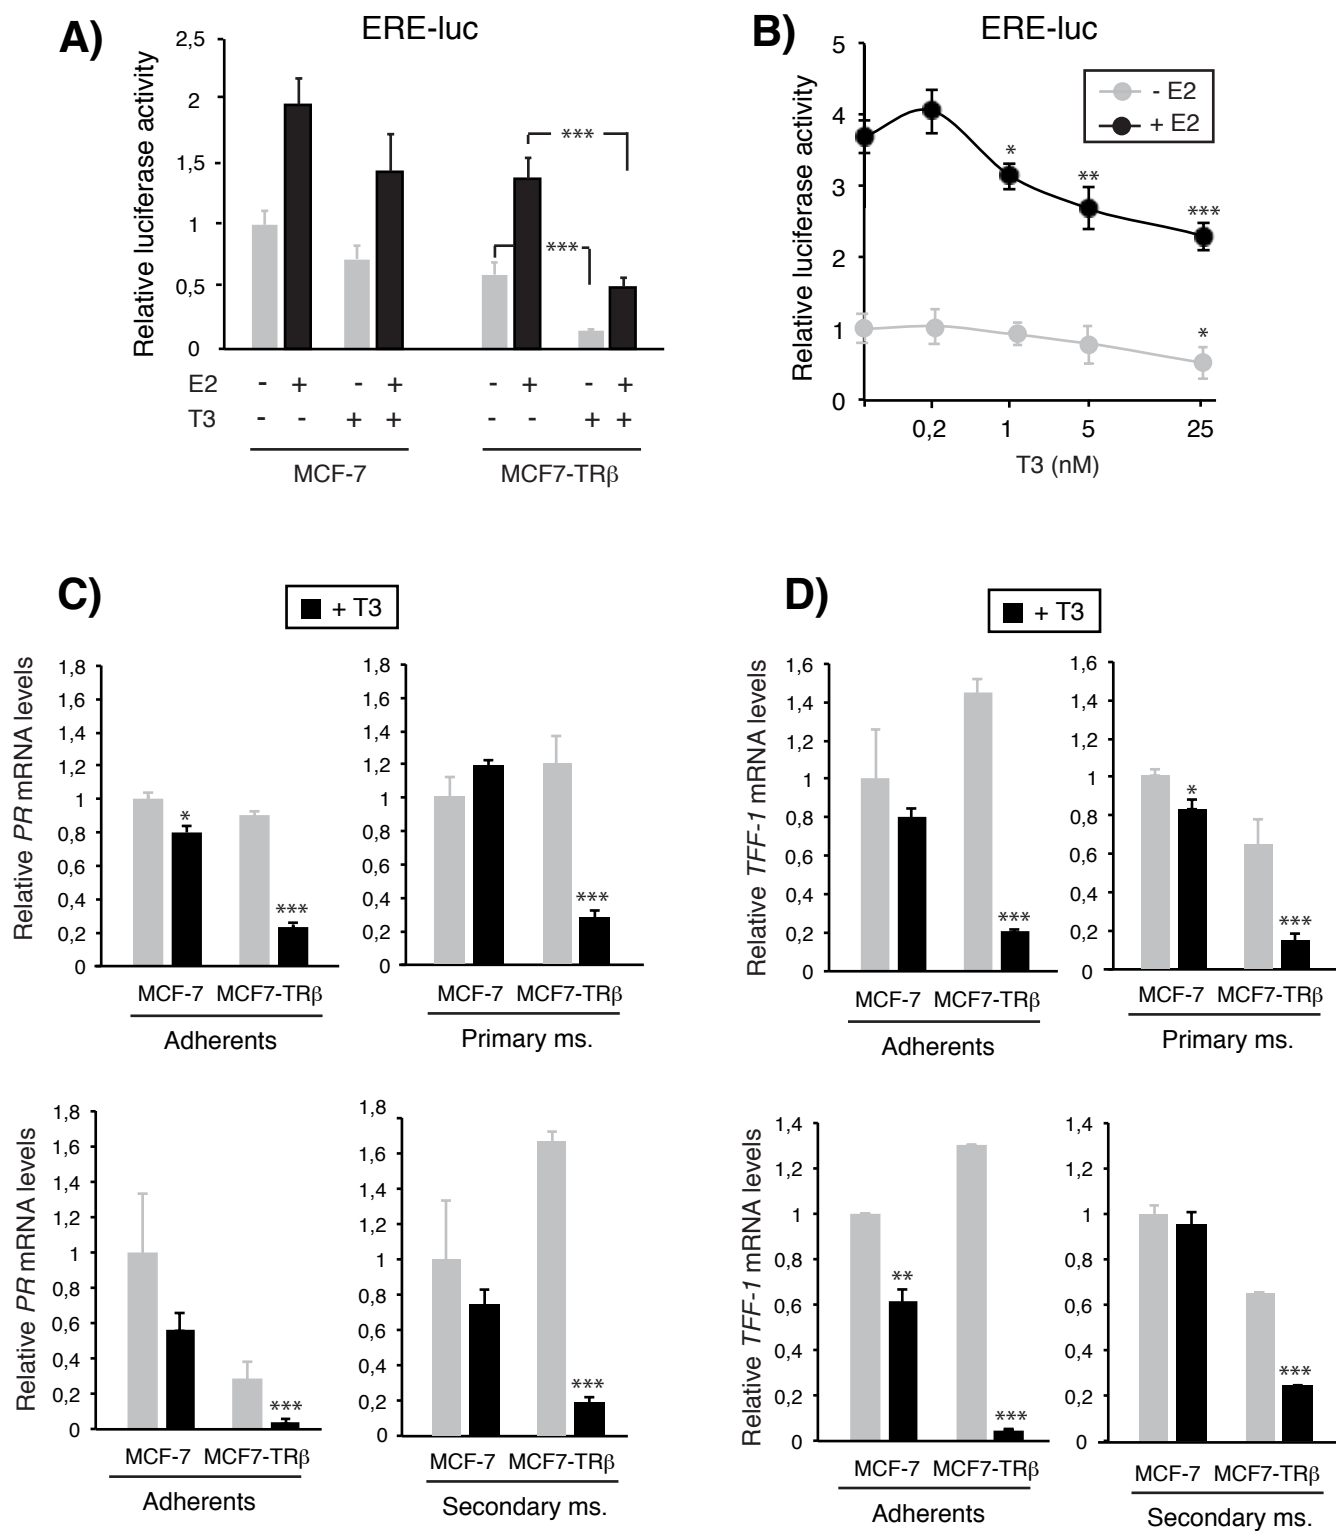

**Fig. S11.** T3 inhibits ER $\alpha$ -dependent transcriptional activity. **A)** Luciferase activity in MCF-7 and MCF7-TR $\beta$  cells transfected with a reporter plasmid containing consensus estrogen response elements (ERE). Cells were treated with 25 nM T3 and/or 10 nM estradiol (E2) for 36h. Data are means  $\pm$  S.D of 6 independent wells. **B)** Luciferase activity in MCF7-TR $\beta$  cells transfected with the ERE reporter plasmid and incubated with or without E2 in the presence of increasing concentrations of T3 ranging from 0,2 nM to 25 nM. **C)** Upper panels: transcript levels of the progesterone receptor (PR) in cells grown as adherent cultures or primary mammospheres for 3 days in the presence and absence of T3. Lower panels: PR transcript levels in adherent cultures and secondary mammospheres after 10 days of incubation with and without T3. **D)** Transcript levels of trifolium factor-1 (TFF-1) in the same samples. Data are means  $\pm$  S.D and are represented relative to the values obtained in the corresponding MCF-7 untreated cells. Asterisks denote statistically significant differences between T3-treated and untreated cultures.
