# Supplementary material
Source: PubMed Central journal article supplement (PMC6998057)
Supplement: Supp_Fig12.pdf [file Supp_Fig12.pdf]

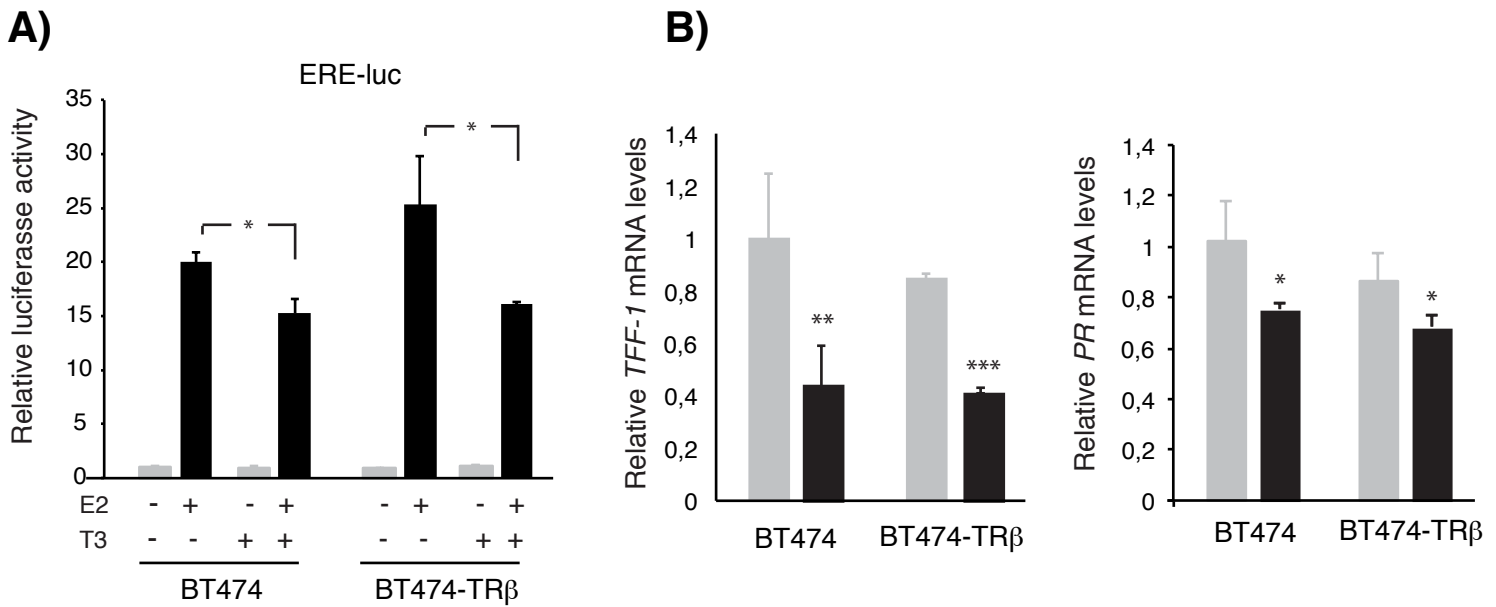

**Fig. S12.** T3 inhibits ER-dependent gene expression in BT474 cells. **A)** Luciferase activity in BT474 and BT474-TR $\beta$  cells transfected with an ERE-reporter plasmid. Cells were treated with 25 nM T3 and/or 10 nM estradiol (E2) for 36h. Data are means $\pm$ S.D of 3 independent cultures. **B)** *TFF-1* and *PR* mRNA levels were determined in cells transiently transfected with an empty vector (BT474) or a TR $\beta$  expression vector ( BT474-TR $\beta$ ) and treated in the presence and absence of 25 nM T3 for 72h. Data are means  $\pm$ S.D and are represented relative to the values obtained in BT474 untreated cells. Asterisks denote statistically significant differences between T3-treated and untreated cultures.
